# Supplementary material for: Citrate Synthase Insufficiency Leads to Specific Metabolic Adaptations in the Heart and Skeletal Muscles Upon Low-Carbohydrate Diet Feeding in Mice
Source: Frontiers journal article supplement (doi:10.3389/fnut.2022.925908), 2022-07-07
Supplement: Image_1.PDF [file Image_1.PDF]

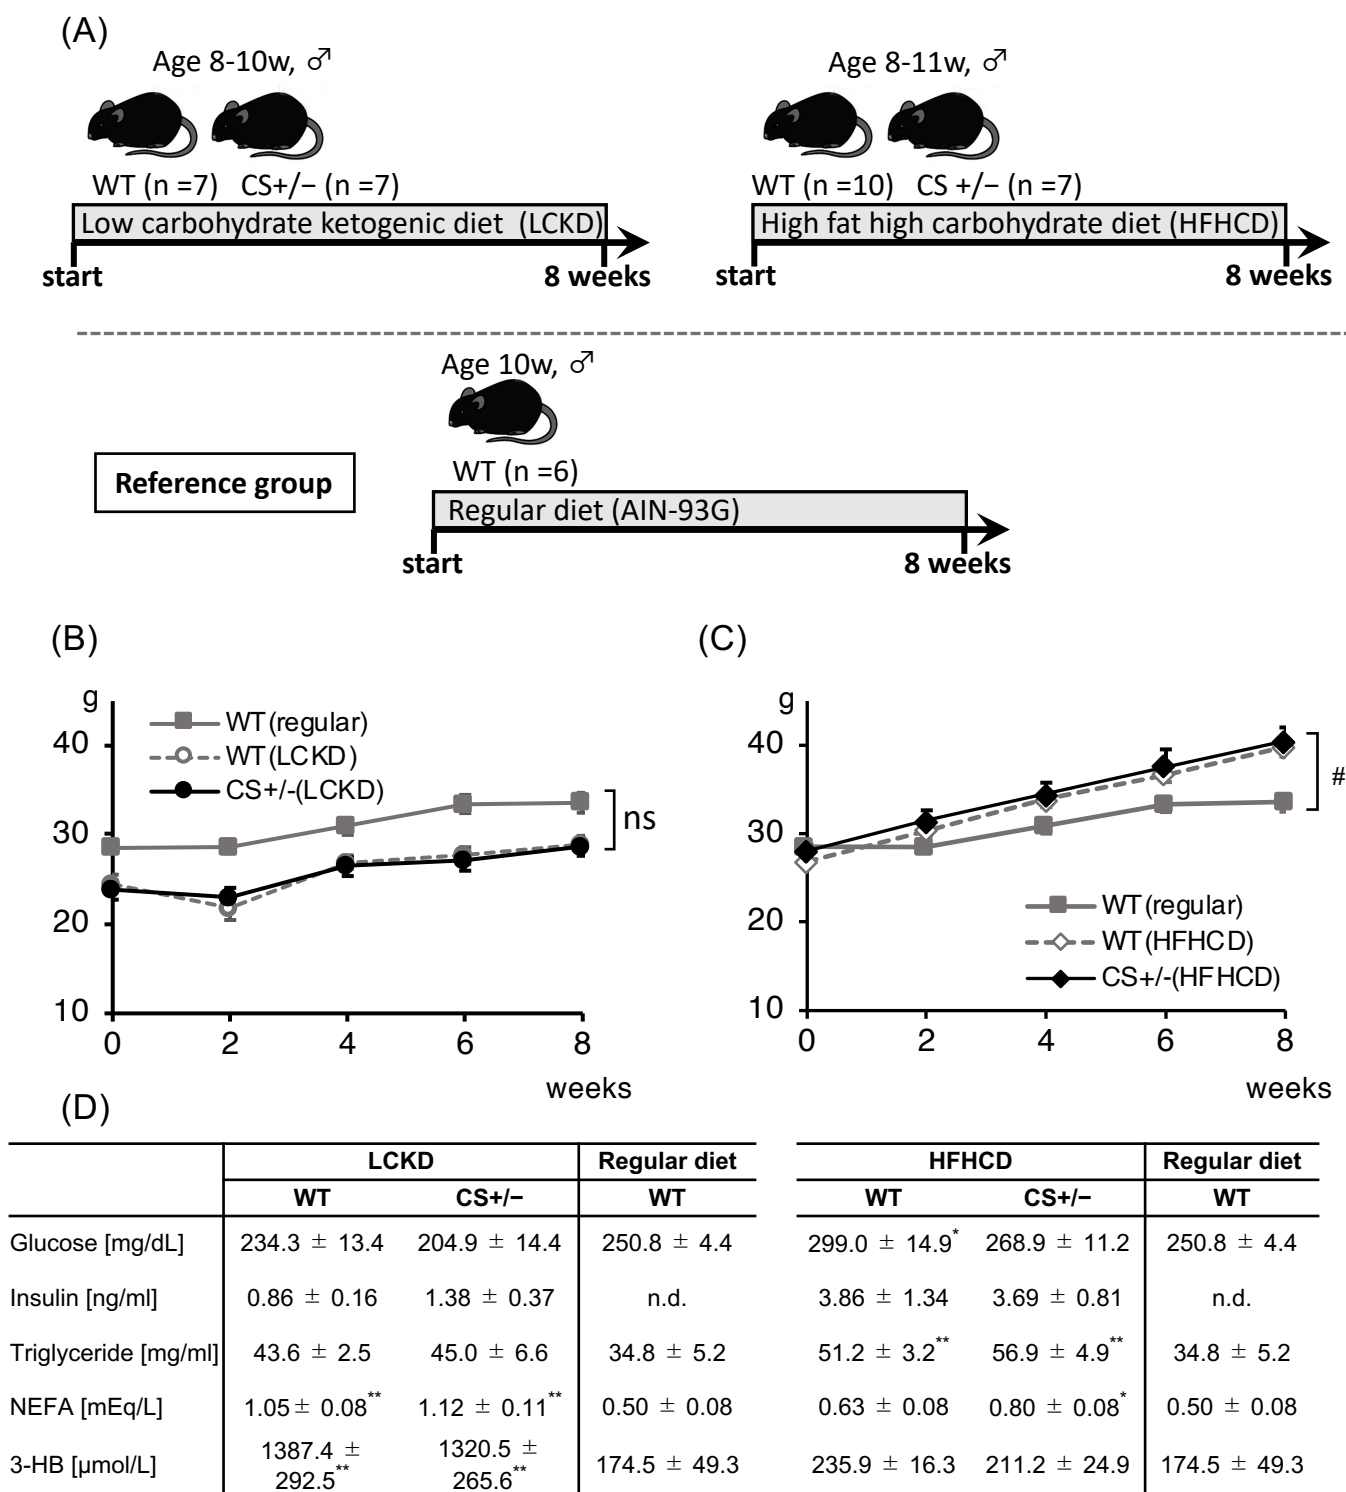

**Supplementary Figure 1.** Comparison of each parameter in mice in the main experiment with that in the reference mice fed a regular diet. (A) Timeline of the experimental protocol. (B) Body weight of hetero knockout mice (CS+/-) and their wild-type siblings (WT) fed an LCKD and that of reference WT mice fed a regular diet, or (C) body weight of CS+/- and WT mice fed an HFHCD and that of reference WT mice fed a regular diet, during the 8-week experimental period. A two-way ANOVA was performed to determine differences among groups. #, the interaction is significant at  $p < 0.05$ . ns, the interaction is not significant. (D) Blood parameters of mice in each group. For the comparison, a one-way ANOVA followed by Tukey multiple comparison test was performed. \*,  $p < 0.05$ ; \*\*,  $p < 0.01$  vs. WT fed a regular diet.
